# Supplementary material
Source: PubMed Central journal article supplement (PMC3390784)
Supplement: NIHMS366891-supplement-01.pdf [file NIHMS366891-supplement-01.pdf]

Supplemental Table 1: Description of Candidate Genes

| Gene Name (Abbreviation)                              | Functional Group          | Gene Length (kb) | LDU across Gene |        | SNP* | NS SNP** |
|-------------------------------------------------------|---------------------------|------------------|-----------------|--------|------|----------|
|                                                       |                           |                  | Blacks          | Whites |      |          |
| Catalase (CAT)                                        | Catalase                  | 33               | 1.16            | 0.06   | 7    | 0        |
| Gamma-glutamyl Transferase 1 (GGT1)                   | GSH Synthesis             | 45               | 2.05            | 1.83   | 3    | 0        |
| Glucose-6-Phosphate Dehydrogenase (G6PD)              | Reducing Equivalents      | 16               | 0               | 0      | 1    | 0        |
| Glutamate-cysteine ligase (catalytic subunit) (GCLC)  | GSH Synthesis             | 48               | 3.85            | 1.71   | 15   | 0        |
| Glutamate-cysteine ligase (modulatory subunit) (GCLM) | GSH Synthesis             | 22               | 0.16            | 0.18   | 6    | 0        |
| Glutaredoxin (GLRX)                                   | Disulfide Reductase       | 9                | 0.74            | 0.21   | 5    | 0        |
| Glutaredoxin 2 (GLRX2)                                | Disulfide Reductase       | 10               | 0               | 0      | 6    | 0        |
| Glutathione Peroxidase 1 (GPX1)                       | Peroxidase Activity       | 1.2              | 0.02            | 0      | 3    | 0        |
| Glutathione Peroxidase 2 (GPX2)                       | Peroxidase Activity       | 3.7              | 0.12            | 0      | 5    | 0        |
| Glutathione Peroxidase 3 (GPX3)                       | Peroxidase Activity       | 8.5              | 1.11            | 0.45   | 4    | 0        |
| Glutathione Peroxidase 4 (GPX4)                       | Peroxidase Activity       | 2.9              | 0.78            | 0.14   | 5    | 0        |
| Glutathione Peroxidase 7 (GPX7)                       | Peroxidase Activity       | 6.7              | 0               | 0      | 5    | 0        |
| Glutathione Reductase (GSR)                           | Disulfide Reductase       | 49               | 1.96            | 0.10   | 9    | 1        |
| Glutathione S-Transferase A1 (GSTA1)                  | Glutathione S-Transferase | 12               | 0.01            | 0      | 3    | 0        |
| Glutathione S-Transferase A2 (GSTA2)                  | Glutathione S-Transferase | 13               | 1.19            | 0.19   | 3    | 1        |
| Glutathione S-Transferase A3 (GSTA3)                  | Glutathione S-Transferase | 13               | 0               | 0.03   | 6    | 1        |
| Glutathione S-Transferase A4 (GSTA4)                  | Glutathione S-Transferase | 17               | 0               | 0.48   | 6    | 0        |
| Glutathione S-Transferase A5 (GSTA5)                  | Glutathione S-Transferase | 14               | 0.18            | 0      | 7    | 1        |
| Glutathione S-Transferase K1 (GSTK1)                  | Glutathione S-Transferase | 5.6              | 0.15            | 0.01   | 1    | 0        |
| Glutathione S-Transferase M2 (GSTM2)                  | Glutathione S-Transferase | 7.2              | 0               | 0.55   | 3    | 0        |
| Glutathione S-Transferase M3 (GSTM3)                  | Glutathione S-Transferase | 6.5              | 0.283           | 0.089  | 6    | 1        |
| Glutathione S-Transferase M4 (GSTM4)                  | Glutathione S-Transferase | 9.4              | 0.235           | 0.664  | 4    | 0        |
| Glutathione S-Transferase O1 (GSTO1)                  | Glutathione S-Transferase | 13               | 0               | 0.005  | 4    | 0        |
| Glutathione S-Transferase O2 (GSTO2)                  | Glutathione S-Transferase | 31               | 0.863           | 0.082  | 9    | 1        |
| Glutathione S-Transferase P1 (GSTP1)                  | Glutathione S-Transferase | 2.8              | 0.055           | 0.083  | 8    | 2        |
| Glutathione S-Transferase Z1 (GSTZ1)                  | Glutathione S-Transferase | 8.1              | 0               | 0      | 6    | 2        |
| Glutathione Synthetase (GSS)                          | GSH Synthesis             | 11               | 0.199           | 0.147  | 7    | 0        |
| Heme-Oxygenase 1 (HMOX1)                              | Heme-Oxygenase            | 13               | 0.234           | 0.206  | 5    | 0        |

| Gene Name (Abbreviation)                       | Functional Group          | Gene Length (kb) | LDU across Gene |       | SNP* | NS SNP** |
|------------------------------------------------|---------------------------|------------------|-----------------|-------|------|----------|
|                                                |                           |                  |                 |       |      |          |
| Heme-Oxygenase 2 (HMOX2)                       | Heme-Oxygenase            | 34               | 0               | 0.099 | 6    | 0        |
| Isocitrate Dehydrogenase 1 (IDH1)              | Reducing Equivalents      | 19               | 1.188           | 0.443 | 7    | 1        |
| Isocitrate Dehydrogenase 2 (IDH2)              | Reducing Equivalents      | 19               | 0.849           | 2.134 | 7    | 0        |
| Isocitrate Dehydrogenase 3A (IDH3A)            | Reducing Equivalents      | 21               | 0               | 0.192 | 5    | 0        |
| Isocitrate Dehydrogenase 3B (IDH3B)            | Reducing Equivalents      | 5.8              | 0.571           | 0.116 | 4    | 0        |
| Isocitrate Dehydrogenase 3G (IDH3G)            | Reducing Equivalents      | 8.7              | 0               | 0.236 | 5    | 0        |
| Microsomal Glutathione S-Transferase 1 (mGST1) | Glutathione S-Transferase | 17               | 1.151           | 2.013 | 8    | 0        |
| Microsomal Glutathione S-Transferase 2 (mGST2) | Glutathione S-Transferase | 39               | 8.838           | 1.303 | 11   | 0        |
| Microsomal Glutathione S-Transferase 3 (mGST3) | Glutathione S-Transferase | 24               | 3.25            | 1.293 | 11   | 0        |
| Peroxiredoxin 1 (PRDX1)                        | Peroxidase Activity       | 11               | 0               | 0     | 3    | 0        |
| Peroxiredoxin 2 (PRDX2)                        | Peroxidase Activity       | 5                | 0.005           | 0     | 6    | 0        |
| Peroxiredoxin 3 (PRDX3)                        | Peroxidase Activity       | 11               | 0.271           | 0.107 | 6    | 0        |
| Peroxiredoxin 4 (PRDX4)                        | Peroxidase Activity       | 19               | 0.218           | 0.039 | 6    | 0        |
| Peroxiredoxin 5 (PRDX5)                        | Peroxidase Activity       | 3.7              | 0.145           | 0     | 6    | 1        |
| Peroxiredoxin 6 (PRDX6)                        | Peroxidase Activity       | 11               | 0.0047          | 0     | 6    | 0        |
| Selenoprotein P 1 (SEPP1)                      | Selenoprotein             | 12               | 0.154           | 0.312 | 6    | 1        |
| Selenoprotein W 1 (SEPW1)                      | Selenoprotein             | 6.1              | 0.032           | 0.131 | 7    | 0        |
| Superoxide Dismutase 1 (SOD1)                  | Superoxide Dismutase      | 9.3              | 0               | 0     | 6    | 0        |
| Superoxide Dismutase 2 (SOD2)                  | Superoxide Dismutase      | 14               | 0.074           | 0.143 | 6    | 1        |
| Superoxide Dismutase 3 (SOD3)                  | Superoxide Dismutase      | 6.4              | 2.603           | 2.277 | 10   | 1        |
| Thioredoxin 1 (TXN)                            | Thioredoxin               | 12               | 1.524           | 1.078 | 5    | 0        |
| Thioredoxin 2 (TXN2)                           | Thioredoxin               | 15               | 1.031           | 0.308 | 5    | 0        |
| Thioredoxin Reductase 1 (TXNRD1)               | Disulfide Reductase       | 63               | 0               | 0     | 8    | 0        |
| Thioredoxin Reductase 2 (TXNRD2)               | Disulfide Reductase       | 66               | 3.599           | 3.071 | 12   | 1        |

| Gene Name (Abbreviation)         | Functional Group    | Gene Length (kb) | LDU across Gene |       | SNP* | NS SNP** |
|----------------------------------|---------------------|------------------|-----------------|-------|------|----------|
|                                  |                     |                  |                 |       |      |          |
| Thioredoxin Reductase 3 (TXNRD3) | Disulfide Reductase | 52               | 0.892           | 0.356 | 4    | 0        |

\*SNP, single nucleotide polymorphism;

\*\*NS SNP, non-synonymous single nucleotide polymorphism

Supplemental Table 2: Single Nucleotide Polymorphisms Studied, by Gene

| Gene                                           | Single Nucleotide Polymorphism | Minor Allele Frequency |                   | Type       |
|------------------------------------------------|--------------------------------|------------------------|-------------------|------------|
|                                                |                                | European Americans     | African Americans |            |
| Catalase                                       | rs564250                       | 22%                    | 20%               | 5' region  |
|                                                | rs769214                       | 33%                    | 41%               | 5' region  |
|                                                | rs484214                       | 29%                    | 29%               | Intron     |
|                                                | rs7933285                      | 27%                    | 18%               | Intron     |
|                                                | rs769217                       | 23%                    | 16%               | Intron     |
|                                                | rs2420388                      | 23%                    | 18%               | Intron     |
|                                                | rs475043                       | 38%                    | 10%               | 3' region  |
| Glucose-6-Phosphate Dehydrogenase              | rs2472394                      | 10%                    | 13%               | Intron     |
| Glutamate-cysteine ligase (catalytic subunit)  | rs742528                       | 26%                    | 38%               | 3' region  |
|                                                | rs6458939                      | 25%                    | 42%               | 3' region  |
|                                                | rs7742367                      | 19%                    | 31%               | 3' region  |
|                                                | rs2066511                      | 26%                    | 25%               | Intron     |
|                                                | rs16883894                     | 9%                     | 35%               | Intron     |
|                                                | rs1555903                      | 9%                     | 27%               | Intron     |
|                                                | rs622447                       | 20%                    | 17%               | Intron     |
|                                                | rs600033                       | 45%                    | 36%               | Intron     |
|                                                | rs4715407                      | 8%                     | 25%               | Intron     |
|                                                | rs4712035                      | 19%                    | 34%               | Intron     |
|                                                | rs2397147                      | 37%                    | 24%               | Intron     |
|                                                | rs606548                       | 6%                     | 34%               | Intron     |
|                                                | rs2284650                      | 5%                     | 6%                | Intron     |
|                                                | rs510088                       | 31%                    | 18%               | Intron     |
|                                                | rs17883901                     | 8%                     | 3%                | 5' region  |
| Glutamate-cysteine ligase (modulatory subunit) | rs7549683                      | 35%                    | 36%               | 3' region  |
|                                                | rs769211                       | 26%                    | 24%               | Intron     |
|                                                | rs7517826                      | 35%                    | 36%               | Intron     |
|                                                | rs3827715                      | 26%                    | 25%               | Intron     |
|                                                | rs2301022                      | 31%                    | 47%               | Intron     |
|                                                | rs41303970                     | 18%                    | 19%               | 5' region  |
| Gamma-glutamyl Transferase 1                   | rs16978740                     | 3%                     | 10%               | Intron     |
|                                                | rs2154611                      | 28%                    | 32%               | Intron     |
|                                                | rs6519519                      | 26%                    | 39%               | Intron     |
| Glutaredoxin                                   | rs1047420                      | 38%                    | 15%               | 3' region  |
|                                                | rs4561                         | 41%                    | 32%               | Synonymous |
|                                                | rs3822751                      | 25%                    | 47%               | Intron     |
|                                                | rs9314160                      | 43%                    | 42%               | Intron     |
|                                                | rs3756704                      | 47%                    | 32%               | 5' region  |
| Glutaredoxin 2                                 | rs34552619                     | 0%                     | 8%                | 3' region  |
|                                                | rs35358794                     | 1%                     | 6%                | Intron     |
|                                                | rs4657845                      | 26%                    | 25%               | Intron     |
|                                                | rs10801174                     | 32%                    | 48%               | Intron     |
|                                                | rs912071                       | 27%                    | 27%               | 5' region  |
| Glutathione Peroxidase 1                       | rs7547615                      | 32%                    | 48%               | 5' region  |
|                                                | rs8179172                      | 0%                     | 9%                | 3' region  |
|                                                | rs3811699                      | 33%                    | 29%               | 5' region  |
| Glutathione Peroxidase 2                       | rs3448                         | 25%                    | 27%               | 5' region  |
|                                                | rs10133054                     | 22%                    | 42%               | 3' region  |
|                                                | rs4902346                      | 22%                    | 41%               | Intron     |

| Gene                         | Single Nucleotide Polymorphism | Minor Allele Frequency |                   | Type          |
|------------------------------|--------------------------------|------------------------|-------------------|---------------|
|                              |                                | European Americans     | African Americans |               |
| Glutathione Peroxidase 3     | rs2412065                      | 22%                    | 41%               | Intron        |
|                              | rs2737844                      | 31%                    | 21%               | Intron        |
|                              | rs17102360                     | 7%                     | 10%               | 5' region     |
|                              | rs1946234                      | 14%                    | 20%               | 5' region     |
|                              | rs3828599                      | 25%                    | 43%               | Intron        |
| Glutathione Peroxidase 4     | rs8177435                      | 39%                    | 30%               | Intron        |
|                              | rs8177447                      | 17%                    | 33%               | Intron        |
|                              | rs757228                       | 45%                    | 41%               | 5' region     |
|                              | rs3746165                      | 45%                    | 42%               | 5' region     |
|                              | rs4807542                      | 18%                    | 4%                | Synonymous    |
| Glutathione Peroxidase 7     | rs8178977                      | 23%                    | 30%               | Intron        |
|                              | rs2074451                      | 50%                    | 29%               | 3' region     |
|                              | rs6588431                      | 39%                    | 40%               | 5' region     |
|                              | rs3753753                      | 26%                    | 13%               | Intron        |
|                              | rs946154                       | 33%                    | 41%               | Intron        |
| Glutathione Reductase        | rs1047635                      | 45%                    | 38%               | 3' region     |
|                              | rs7529595                      | 31%                    | 12%               | 3' region     |
|                              | rs3594                         | 39%                    | 18%               | 3' region     |
|                              | rs2250192                      | 21%                    | 35%               | Intron        |
|                              | rs8190996                      | 43%                    | 32%               | Intron        |
| Glutathione Synthetase       | rs8190955                      | 0%                     | 8%                | Nonsynonymous |
|                              | rs2978662                      | 19%                    | 34%               | Intron        |
|                              | rs2978296                      | 19%                    | 29%               | Intron        |
|                              | rs10088455                     | 0%                     | 35%               | Intron        |
|                              | rs8190907                      | 0%                     | 38%               | Intron        |
|                              | rs1002149                      | 17%                    | 24%               | 5' region     |
|                              | rs725521                       | 39%                    | 46%               | 3' region     |
|                              | rs6087651                      | 39%                    | 45%               | Intron        |
|                              | rs6087653                      | 39%                    | 46%               | Intron        |
|                              | rs2273684                      | 45%                    | 30%               | Intron        |
| Glutathione S-Transferase A1 | rs6060127                      | 29%                    | 20%               | Intron        |
|                              | rs6088659                      | 19%                    | 4%                | Intron        |
|                              | rs3761144                      | 41%                    | 24%               | 5' region     |
|                              | rs6920039                      | 0%                     | 9%                | 3' region     |
|                              | rs6917325                      | 44%                    | 31%               | Intron        |
| Glutathione S-Transferase A2 | rs3756982                      | 44%                    | 31%               | 5' region     |
|                              | rs2180314                      | 43%                    | 33%               | Nonsynonymous |
|                              | rs2180319                      | 33%                    | 7%                | Intron        |
| Glutathione S-Transferase A3 | rs2608629                      | 37%                    | 14%               | Intron        |
|                              | rs10214816                     | 3%                     | 18%               | 3' region     |
|                              | rs557135                       | 37%                    | 35%               | Intron        |
|                              | rs1052661                      | 0%                     | 13%               | Nonsynonymous |
|                              | rs2281594                      | 4%                     | 40%               | Intron        |
| Glutathione S-Transferase A4 | rs614765                       | 4%                     | 43%               | Intron        |
|                              | rs563464                       | 3%                     | 33%               | 5' region     |
|                              | rs405729                       | 45%                    | 45%               | 3' region     |
|                              | rs316133                       | 39%                    | 48%               | Intron        |
|                              | rs3756980                      | 20%                    | 11%               | Intron        |
| Glutathione S-Transferase A5 | rs6904771                      | 2%                     | 24%               | Intron        |
|                              | rs11967816                     | 8%                     | 7%                | Intron        |
|                              | rs13207376                     | 8%                     | 10%               | Intron        |
|                              | rs4236107                      | 0%                     | 15%               | 3' region     |

| Gene                         | Single Nucleotide Polymorphism | Minor Allele Frequency |                   | Type              |
|------------------------------|--------------------------------|------------------------|-------------------|-------------------|
|                              |                                | European Americans     | African Americans |                   |
|                              | rs10948726                     | 40%                    | 9%                | 3' region         |
|                              | rs7755335                      | 4%                     | 13%               | Intron            |
|                              | rs2397118                      | 4%                     | 13%               | Nonsynonymous     |
|                              | rs4715353                      | 44%                    | 38%               | Intron            |
|                              | rs4715354                      | 46%                    | 16%               | Intron            |
|                              | rs7749576                      | 6%                     | 42%               | Intron            |
| Glutathione S-Transferase K1 | rs7803893                      | 0%                     | 4%                | Intron            |
| Glutathione S-Transferase M2 | rs638820                       | 48%                    | 50%               | 5' region         |
|                              | rs625456                       | 14%                    | 17%               | Intron            |
|                              | rs673151                       | 6%                     | 3%                | Intron            |
| Glutathione S-Transferase M3 | rs1927328                      | 31%                    | 12%               | 3' region         |
|                              | rs1537236                      | 49%                    | 41%               | 3' region         |
|                              | rs7483                         | 30%                    | 12%               | Nonsynonymous     |
|                              | rs1571858                      | 30%                    | 15%               | Intron            |
|                              | rs10735234                     | 43%                    | 16%               | Intron            |
|                              | rs1332018                      | 44%                    | 19%               | 5' region         |
| Glutathione S-Transferase M4 | rs560018                       | 36%                    | 14%               | Intron            |
|                              | rs535537                       | 13%                    | 12%               | Intron            |
|                              | rs627365                       | 14%                    | 3%                | Intron            |
|                              | rs670439                       | 14%                    | 13%               | Intron            |
| Glutathione S-Transferase O1 | rs2164624                      | 34%                    | 13%               | 5' region         |
|                              | rs12259337                     | 0%                     | 25%               | Intron            |
|                              | rs17116741                     | 0%                     | 25%               | Intron            |
|                              | rs1147611                      | 38%                    | 28%               | Intron            |
| Glutathione S-Transferase O2 | rs12264844                     | 0%                     | 25%               | 5' region         |
|                              | rs7089730                      | 0%                     | 25%               | Intron            |
|                              | rs7070750                      | 0%                     | 34%               | Intron            |
|                              | rs157077                       | 46%                    | 25%               | Intron            |
|                              | rs156697                       | 35%                    | 29%               | Nonsynonymous     |
|                              | rs276203                       | 35%                    | 29%               | Intron            |
|                              | rs157076                       | 32%                    | 33%               | Intron            |
|                              | rs157080                       | 32%                    | 31%               | Intron            |
|                              | rs3740466                      | 29%                    | 24%               | 3' region         |
| Glutathione S-Transferase P1 | rs6591256                      | 39%                    | 38%               | 5' region         |
|                              | rs4147581                      | 49%                    | 16%               | Intron            |
|                              | rs8191446                      | 0%                     | 12%               | Intron            |
|                              | rs1695                         | 32%                    | 45%               | Nonsynonymous     |
|                              | rs749174                       | 33%                    | 26%               | Intron            |
|                              | rs743679                       | 0%                     | 12%               | Intron            |
|                              | rs1138272                      | 8%                     | 1%                | Nonsynonymous     |
|                              | rs947895                       | 33%                    | 26%               | 3' region         |
| Glutathione S-Transferase Z1 | rs2111699                      | 32%                    | 31%               | Intron            |
|                              | rs2363643                      | 32%                    | 31%               | Splice Site Donor |
|                              | rs2270422                      | 39%                    | 15%               | Intron            |
|                              | rs3177427                      | 34%                    | 29%               | Nonsynonymous     |
|                              | rs1046428                      | 20%                    | 9%                | Nonsynonymous     |
|                              | rs1017186                      | 20%                    | 11%               | 3' region         |
| Heme-Oxygenase 1             | rs6518952                      | 0%                     | 32%               | Intron            |
|                              | rs2071749                      | 46%                    | 12%               | Intron            |
|                              | rs5755720                      | 35%                    | 20%               | Intron            |
|                              | rs2285112                      | 41%                    | 34%               | Intron            |

| Gene                                   | Single Nucleotide Polymorphism | Minor Allele Frequency |                   | Type          |
|----------------------------------------|--------------------------------|------------------------|-------------------|---------------|
|                                        |                                | European Americans     | African Americans |               |
| Heme-Oxygenase 2                       | rs17883419                     | 6%                     | 11%               | 3' region     |
|                                        | rs11639998                     | 26%                    | 22%               | Intron        |
|                                        | rs8055559                      | 4%                     | 26%               | Intron        |
|                                        | rs11643057                     | 28%                    | 35%               | Intron        |
|                                        | rs1362626                      | 27%                    | 48%               | Intron        |
|                                        | rs2270366                      | 32%                    | 25%               | Intron        |
| Isocitrate Dehydrogenase 1             | rs1051308                      | 31%                    | 25%               | 3' region     |
|                                        | rs7593466                      | 21%                    | 35%               | 3' region     |
|                                        | rs7565247                      | 8%                     | 42%               | Intron        |
|                                        | rs34218846                     | 7%                     | 8%                | Nonsynonymous |
|                                        | rs6435435                      | 7%                     | 13%               | Intron        |
|                                        | rs12612631                     | 0%                     | 14%               | Intron        |
|                                        | rs1437410                      | 42%                    | 22%               | Intron        |
|                                        | rs10207062                     | 42%                    | 22%               | 5' region     |
| Isocitrate Dehydrogenase 2             | rs7176347                      | 0%                     | 12%               | 3' region     |
|                                        | rs9972549                      | 2%                     | 43%               | Intron        |
|                                        | rs11073899                     | 17%                    | 20%               | Intron        |
|                                        | rs8030346                      | 41%                    | 28%               | Intron        |
|                                        | rs8028234                      | 25%                    | 35%               | Intron        |
|                                        | rs4932279                      | 44%                    | 24%               | Intron        |
|                                        | rs7182369                      | 25%                    | 34%               | Intron        |
| Isocitrate Dehydrogenase 3A            | rs11631100                     | 42%                    | 47%               | Intron        |
|                                        | rs8032618                      | 50%                    | 33%               | Intron        |
|                                        | rs7180781                      | 1%                     | 11%               | Intron        |
|                                        | rs3816253                      | 44%                    | 48%               | Intron        |
|                                        | rs17674205                     | 8%                     | 2%                | 3' region     |
| Isocitrate Dehydrogenase 3B            | rs6037255                      | 26%                    | 41%               | Intron        |
|                                        | rs6115381                      | 7%                     | 37%               | Intron        |
|                                        | rs6107100                      | 7%                     | 37%               | Intron        |
|                                        | rs2073192                      | 7%                     | 5%                | 5' region     |
| Isocitrate Dehydrogenase 3G            | rs2071122                      | 28%                    | 35%               | Intron        |
|                                        | rs2071123                      | 28%                    | 34%               | Intron        |
|                                        | rs2071124                      | 7%                     | 10%               | Intron        |
|                                        | rs17429                        | 0%                     | 22%               | Intron        |
|                                        | rs2283753                      | 7%                     | 10%               | Intron        |
|                                        | rs4898445                      | 35%                    | 26%               | Intron        |
| Microsomal Glutathione S-Transferase 1 | rs7970208                      | 47%                    | 29%               | 5' region     |
|                                        | rs7294985                      | 24%                    | 36%               | Intron        |
|                                        | rs2975149                      | 25%                    | 42%               | Intron        |
|                                        | rs2075237                      | 20%                    | 15%               | Intron        |
|                                        | rs4149197                      | 31%                    | 46%               | Intron        |
|                                        | rs9332939                      | 50%                    | 31%               | Intron        |
|                                        | rs3852576                      | 49%                    | 22%               | Intron        |
|                                        | rs7135371                      | 49%                    | 31%               | 3' region     |
| Microsomal Glutathione S-Transferase 2 | rs8191997                      | 16%                    | 26%               | 5' region     |
|                                        | rs8192004                      | 9%                     | 6%                | 5' region     |
|                                        | rs1000222                      | 39%                    | 48%               | Intron        |
|                                        | rs795594                       | 47%                    | 23%               | Intron        |
|                                        | rs8192047                      | 26%                    | 9%                | Intron        |
|                                        | rs795590                       | 2%                     | 9%                | Intron        |
|                                        | rs795589                       | 42%                    | 49%               | Intron        |
|                                        | rs8192066                      | 0%                     | 7%                | Intron        |

| Gene                                   | Single Nucleotide Polymorphism | Minor Allele Frequency |                   | Type          |
|----------------------------------------|--------------------------------|------------------------|-------------------|---------------|
|                                        |                                | European Americans     | African Americans |               |
| Microsomal Glutathione S-Transferase 3 | rs7664313                      | 21%                    | 39%               | Intron        |
|                                        | rs2646076                      | 22%                    | 28%               | Intron        |
|                                        | rs2646035                      | 17%                    | 42%               | 3' region     |
|                                        | rs7549530                      | 16%                    | 19%               | 5' region     |
|                                        | rs10737515                     | 47%                    | 20%               | 5' region     |
|                                        | rs9333378                      | 38%                    | 36%               | Intron        |
|                                        | rs10800120                     | 40%                    | 20%               | Intron        |
|                                        | rs7554034                      | 21%                    | 46%               | Intron        |
|                                        | rs957644                       | 26%                    | 46%               | Intron        |
|                                        | rs9333471                      | 29%                    | 44%               | Intron        |
|                                        | rs4147602                      | 31%                    | 43%               | Intron        |
|                                        | rs2297765                      | 44%                    | 36%               | Intron        |
|                                        | rs7533986                      | 30%                    | 26%               | Intron        |
| Peroxiredoxin 1                        | rs10494446                     | 14%                    | 29%               | Intron        |
|                                        | rs4660306                      | 35%                    | 19%               | Intron        |
|                                        | rs2152077                      | 35%                    | 41%               | Intron        |
|                                        | rs713358                       | 22%                    | 25%               | 5' region     |
| Peroxiredoxin 2                        | rs10404253                     | 1%                     | 23%               | 3' region     |
|                                        | rs35866106                     | 1%                     | 5%                | Intron        |
|                                        | rs10413408                     | 3%                     | 18%               | Intron        |
| Peroxiredoxin 3                        | rs1205171                      | 18%                    | 5%                | Intron        |
|                                        | rs10422248                     | 3%                     | 16%               | Intron        |
|                                        | rs8107906                      | 3%                     | 18%               | 5' region     |
|                                        | rs7068937                      | 47%                    | 19%               | 3' region     |
|                                        | rs7768                         | 33%                    | 44%               | 3' region     |
|                                        | rs11198808                     | 13%                    | 16%               | Intron        |
|                                        | rs4752257                      | 13%                    | 19%               | Intron        |
|                                        | rs11198811                     | 32%                    | 48%               | Intron        |
|                                        | rs1553850                      | 42%                    | 23%               | 5' region     |
|                                        | rs557914                       | 40%                    | 37%               | Intron        |
| Peroxiredoxin 4                        | rs513573                       | 40%                    | 38%               | Intron        |
|                                        | rs528960                       | 9%                     | 24%               | Intron        |
|                                        | rs518329                       | 40%                    | 38%               | Intron        |
|                                        | rs795489                       | 42%                    | 32%               | Intron        |
|                                        | rs1548734                      | 40%                    | 38%               | Intron        |
|                                        | rs477233                       | 42%                    | 41%               | 3' region     |
|                                        | rs9787810                      | 32%                    | 7%                | 5' region     |
| Peroxiredoxin 5                        | rs7938623                      | 0%                     | 19%               | Nonsynonymous |
|                                        | rs7941847                      | 0%                     | 12%               | Intron        |
|                                        | rs566049                       | 0%                     | 13%               | Intron        |
|                                        | rs1047206                      | 15%                    | 5%                | 3' region     |
|                                        | rs4930702                      | 14%                    | 25%               | 3' region     |
|                                        | rs34619706                     | 10%                    | 2%                | 5' region     |
| Peroxiredoxin 6                        | rs34977864                     | 0%                     | 7%                | 5' region     |
|                                        | rs7540065                      | 25%                    | 38%               | Intron        |
|                                        | rs9425725                      | 0%                     | 20%               | Intron        |
|                                        | rs34308867                     | 0%                     | 10%               | Intron        |
|                                        | rs6702835                      | 24%                    | 41%               | 3' region     |
|                                        | rs230813                       | 46%                    | 45%               | 3' region     |
|                                        | rs6413428                      | 25%                    | 34%               | 3' region     |
| Selenoprotein P 1                      | rs3877899                      | 24%                    | 27%               | Nonsynonymous |
|                                        | rs1046068                      | 29%                    | 15%               | Intron        |



| Gene                    | Single Nucleotide Polymorphism | Minor Allele Frequency |                   | Type          |
|-------------------------|--------------------------------|------------------------|-------------------|---------------|
|                         |                                | European Americans     | African Americans |               |
| Selenoprotein W 1       | rs230820                       | 45%                    | 45%               | Intron        |
|                         | rs6865453                      | 26%                    | 7%                | Intron        |
|                         | rs11670990                     | 33%                    | 43%               | 5' region     |
|                         | rs1862485                      | 31%                    | 25%               | Intron        |
|                         | rs3815751                      | 33%                    | 46%               | Intron        |
|                         | rs10412896                     | 36%                    | 42%               | Intron        |
|                         | rs10427074                     | 0%                     | 12%               | Intron        |
| Superoxide Dismutase 1  | rs3786777                      | 48%                    | 11%               | Intron        |
|                         | rs2042286                      | 42%                    | 42%               | 3' region     |
|                         | rs11910115                     | 0%                     | 12%               | 5' region     |
|                         | rs4998557                      | 11%                    | 39%               | Intron        |
|                         | rs2070424                      | 6%                     | 19%               | Intron        |
| Superoxide Dismutase 2  | rs1041740                      | 32%                    | 10%               | Intron        |
|                         | rs4342445                      | 22%                    | 15%               | 3' region     |
|                         | rs2758329                      | 50%                    | 41%               | 3' region     |
|                         | rs8031                         | 49%                    | 34%               | Intron        |
|                         | rs2758331                      | 49%                    | 25%               | Intron        |
| Superoxide Dismutase 3  | rs4880                         | 48%                    | 44%               | Nonsynonymous |
|                         | rs2758346                      | 49%                    | 44%               | 5' region     |
|                         | rs2284659                      | 37%                    | 18%               | 5' region     |
|                         | rs8192287                      | 7%                     | 2%                | 5' region     |
|                         | rs699474                       | 2%                     | 9%                | Intron        |
|                         | rs17885542                     | 1%                     | 13%               | Intron        |
|                         | rs17878863                     | 8%                     | 1%                | Intron        |
|                         | rs7655372                      | 1%                     | 8%                | Intron        |
|                         | rs1007991                      | 34%                    | 22%               | Intron        |
|                         | rs1799895                      | 1%                     | 0%                | Nonsynonymous |
| Thioredoxin 1           | rs2855262                      | 37%                    | 18%               | 3' region     |
|                         | rs2695234                      | 9%                     | 50%               | 3' region     |
|                         | rs2026312                      | 42%                    | 35%               | 3' region     |
|                         | rs1964889                      | 34%                    | 25%               | Intron        |
|                         | rs2418076                      | 27%                    | 44%               | Intron        |
|                         | rs4135191                      | 2%                     | 10%               | Intron        |
|                         | rs4135168                      | 25%                    | 28%               | Intron        |
| Thioredoxin 2           | rs5995291                      | 11%                    | 34%               | Intron        |
|                         | rs8139906                      | 18%                    | 40%               | Intron        |
|                         | rs2283965                      | 19%                    | 24%               | Intron        |
|                         | rs2267337                      | 19%                    | 22%               | Intron        |
| Thioredoxin Reductase 1 | rs2281082                      | 20%                    | 22%               | Intron        |
|                         | rs11111979                     | 46%                    | 32%               | 5' region     |
|                         | rs4523760                      | 24%                    | 26%               | Intron        |
|                         | rs5018287                      | 46%                    | 37%               | Intron        |
|                         | rs4595619                      | 46%                    | 32%               | Intron        |
|                         | rs17202060                     | 34%                    | 17%               | Intron        |
|                         | rs7138318                      | 32%                    | 39%               | Intron        |
|                         | rs11610799                     | 8%                     | 13%               | Intron        |
| Thioredoxin Reductase 2 | rs4964785                      | 46%                    | 38%               | 3' region     |
|                         | rs7285948                      | 16%                    | 38%               | 3' region     |
|                         | rs1139795                      | 17%                    | 45%               | Synonymous    |
|                         | rs1139793                      | 26%                    | 10%               | Nonsynonymous |
|                         | rs2073750                      | 23%                    | 44%               | Intron        |
|                         | rs9606173                      | 15%                    | 18%               | Intron        |

| Gene                    | Single Nucleotide Polymorphism | Minor Allele Frequency |                   | Type          |
|-------------------------|--------------------------------|------------------------|-------------------|---------------|
|                         |                                | European Americans     | African Americans |               |
| Thioredoxin Reductase 3 | rs5992493                      | 18%                    | 50%               | Intron        |
|                         | rs3788314                      | 48%                    | 28%               | Intron        |
|                         | rs756661                       | 44%                    | 25%               | Intron        |
|                         | rs5748469                      | 36%                    | 24%               | Nonsynonymous |
|                         | rs5748471                      | 44%                    | 23%               | Intron        |
|                         | rs9306229                      | 22%                    | 15%               | Intron        |
|                         | rs737866                       | 29%                    | 14%               | 5' region     |
|                         | rs9834240                      | 35%                    | 38%               | Intron        |
|                         | rs1520850                      | 34%                    | 46%               | Intron        |
|                         | rs777238                       | 12%                    | 50%               | Intron        |
| rs9637365               | 42%                            | 27%                    | Intron            |               |

## Online Supporting Material

Supplemental Table 3: Statistically Significant Associations in Models with Small Numbers in Genotype/Smoking Subgroups<sup>a</sup>

| Population | Outcome                                          | SNP (*smoking parameter)    | Gene         | Function                  | P-value <sup>b</sup> | SNP Type      |
|------------|--------------------------------------------------|-----------------------------|--------------|---------------------------|----------------------|---------------|
| Whites     | % Pred FEV <sub>1</sub><br>FEV <sub>1</sub> /FVC | Rs2066511*Dose              | <i>GCLC</i>  | GSH Synthesis             | 0.00008              | Intron        |
|            |                                                  | Rs2154611*Dose <sup>c</sup> | <i>GGT1</i>  | GSH Synthesis             | 0.0004               | Intron        |
|            |                                                  | Rs6519519*Dose <sup>c</sup> | <i>GGT1</i>  | GSH Synthesis             | 0.0004               | Intron        |
|            |                                                  | Rs17102360*Dose             | <i>GPX2</i>  | Peroxidase Activity       | 0.002                | 5' region     |
|            |                                                  | Rs3828599*Dose              | <i>GPX3</i>  | Peroxidase Activity       | 0.001                | Intron        |
|            |                                                  | Rs8177447*Dose              | <i>GPX3</i>  | Peroxidase Activity       | 0.0003               | Intron        |
|            |                                                  | rs10214816*Dose             | <i>GSTA3</i> | Glutathione S-Transferase | 0.002                | Intron        |
|            |                                                  | Rs7749576*Dose              | <i>GSTA5</i> | Glutathione S-Transferase | 0.001                | Intron        |
|            |                                                  | Rs1046428*Dose <sup>d</sup> | <i>GSTZ1</i> | Glutathione S-Transferase | 0.0006               | NonSynonymous |
|            |                                                  | Rs1017186*Dose <sup>d</sup> | <i>GSTZ1</i> | Glutathione S-Transferase | 0.0004               | 3' region     |
|            |                                                  | Rs2071749*Dose              | <i>HMOX1</i> | Heme-Oxygenase            | 0.002                | Intron        |
|            |                                                  | Rs11631100*Dose             | <i>IDH3A</i> | Reducing Equivalents      | 0.0001               | Intron        |
|            |                                                  | Rs3816253*Dose              | <i>IDH3A</i> | Reducing Equivalents      | 0.0002               | Intron        |
|            |                                                  | Rs8032618*Dose              | <i>IDH3A</i> | Reducing Equivalents      | 0.001                | Intron        |
|            |                                                  | Rs2071124*Dose              | <i>IDH3G</i> | Reducing Equivalents      | 0.0009               | Intron        |
|            |                                                  | Rs2283753*Dose              | <i>IDH3G</i> | Reducing Equivalents      | 0.001                | Intron        |
|            |                                                  | Rs4898445*Dose              | <i>IDH3G</i> | Reducing Equivalents      | 0.001                | Intron        |
|            |                                                  | Rs2646035*Dose              | <i>mGST2</i> | Glutathione S-Transferase | 0.003                | 3' region     |
|            |                                                  | Rs795590*Dose               | <i>mGST2</i> | Glutathione S-Transferase | 0.002                | Intron        |
|            |                                                  | Rs4342445*Dose              | <i>SOD2</i>  | Superoxide Dismutase      | 0.0009               | 3' region     |
| Blacks     | FEV <sub>1</sub> /FVC                            | Rs2284650*Status            | <i>GCLC</i>  | Glutathione Synthesis     | 0.0000009            | Intron        |
|            |                                                  | Rs2071749*Status            | <i>HMOX1</i> | Heme-Oxygenase            | 0.0008               | Intron        |
|            |                                                  | Rs3786777*Status            | <i>SEPWI</i> | Selenoprotein             | 0.0006               | Intron        |
|            |                                                  | Rs4135191*Status            | <i>TXN</i>   | Disulfide Reductase       | 0.0004               | Intron        |
|            |                                                  | Rs2284650*Dose              | <i>GCLC</i>  | Glutathione Synthesis     | 0.000002             | Intron        |
|            |                                                  | Rs17674205*Dose             | <i>IDH3A</i> | Reducing Equivalents      | 0.0009               | 3' region     |

<sup>a</sup>All results with nominal p-value <0.002<sup>b</sup>Nominal p-values shown<sup>c</sup>Strong LD observed between these SNPs (R<sup>2</sup>=0.93)<sup>d</sup>Strong LD observed between these SNPs (R<sup>2</sup>=0.90)

## Online Supporting Material

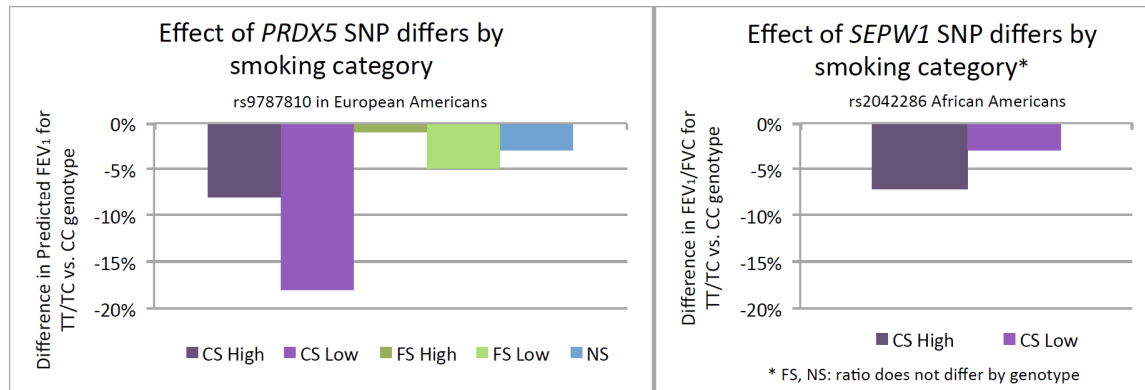

## Graphical abstract

\*abbreviations: FEV<sub>1</sub>, forced expiratory volume in the first second; CS High, cigarette smokers at higher dose; CS Low, cigarette smokers lower dose; FS High, former smokers at higher dose; FS Low, former smokers at lower dose; NS, never smokers.

**Online Supporting Material*****Highlights***

- We evaluated polymorphisms in genes with antioxidant function and lung function phenotypes.
- Interactions between variants and cigarette smoking parameters were investigated.
- Without consideration of smoking, no variant was associated with lung function.
- Results highlight *IDH3A*, *IDH3B*, *IDH2*, and *PRDX5* for further investigation.
